# Supplementary material for: Extra-cellular expansion in the normal, non-infarcted myocardium is associated with worsening of regional myocardial function after acute myocardial infarction
Source: PubMed Central journal article supplement (PMC5613621; doi:10.1186/s12968-017-0384-0), 2017-09-25
Supplement: 12968_2017_384_MOESM1_ESM.pdf [file 12968_2017_384_MOESM1_ESM.pdf]

## **Supplemental Material.**

### **Image analysis**

Cine, T2W-images, and LGE-images were evaluated offline using MASS research software (Version 2016EXP, Leiden University Medical Centre, Leiden, The Netherlands). Left ventricular volumes and EF were analysed from cine images using standard methods using endo/epi-contours at end-diastolic and end-systolic phases [1]. Infarct size (IS) was quantified using the previously published semi-automated full-width at half-maximum (FWHM) method on contiguous LGE short-axis slices [2,3]. Transmurality was assessed by measuring the depth of scar from the endocardium relative to the full thickness of the LV wall on LGE-imaging for all 800 segments on acute scans. Area at risk was similarly quantified using the previously validated FWHM method on T2-weighted short-axis contiguous slices [4]. MVO was defined visually as the hypo-intense core within the infarcted zone on EGE-imaging and planimeted manually. Additionally, radial strain was computed using endo-/epi- cardial contours throughout the complete cardiac cycle as per previously described methods [5].

### **T1-Maps quality checks**

The presence of off-resonance artefacts and diaphragmatic movement was assessed by examination of the raw T1-weighted images by the radiographers. If significant off-resonance artefacts were detected live, T1-maps were repeated. T1-maps were generated on a Philips workstation.

We used parametric confidence maps of the goodness-of-fit generated (R2-maps) to assess how well T1-model fitting was achieved for each T1-map. Both the T1-maps and R2-maps were assessed by two independent assessors to check for partial volume effect and any other artefacts. In cases where there was partial volume effect, offline manual motion correction using MASS (Version 2016EXP, Leiden University Medical Centre, Leiden, The Netherlands) was applied to generate the maps. Care was taken to exclude epicardial structures and blood

Garg et al. Extra-cellular expansion in the normal, non-infarcted myocardium is associated with worsening of regional myocardial function after acute myocardial infarction

pool from the endo/epi-cardial contours. Native T1 endo/epi cardiac contours were transposed on post-contrast T1-maps manually and minor corrections applied if necessary for co-registration.

**Table 1.** Cardiac magnetic resonance study protocol sequence parameters for both field strength scanners.

| MRI        | 1.5 Tesla                       | 3 Tesla                       |
|------------|---------------------------------|-------------------------------|
| Systems    | (Philips Ingenia Omega HP)      | (Philips Achieva TX)          |
| Cines      | • 30 phase bSSFP                | • 30 phase bSSFP              |
| (HLA,      | • SENSE factor 2                | • No parallel imaging         |
| VLA, and   | • Typical TE/TR = 1.5/3.0 ms    | • Typical TE/TR = 1.4/2.8     |
| full LV    | • Flip angle = 60°              | ms                            |
| stack-     | • Typical BW = 950 Hz/pix       | • Flip angle = 45°            |
| contiguous | • Typical in-plane resolution = | • Typical BW = 2500 Hz/pix    |
| slices)    | 1.7 mm acq/1.0 mm recon         | • Typical in-plane resolution |
|            | • Slice thickness = 8 mm        | = 1.7 mm acq/1.2 mm           |
|            |                                 | recon                         |
|            |                                 | • Slice thickness = 8 mm      |

Garg et al. Extra-cellular expansion in the normal, non-infarcted myocardium is associated with worsening of regional myocardial function after acute myocardial infarction

| MRI                | 1.5 Tesla                                                                                                                                                                                                                                                                                                                                                                    | 3 Tesla                                                                                                                                                                                                                                                                                                                                                                       |
|--------------------|------------------------------------------------------------------------------------------------------------------------------------------------------------------------------------------------------------------------------------------------------------------------------------------------------------------------------------------------------------------------------|-------------------------------------------------------------------------------------------------------------------------------------------------------------------------------------------------------------------------------------------------------------------------------------------------------------------------------------------------------------------------------|
| Systems            | (Philips Ingenia Omega HP)                                                                                                                                                                                                                                                                                                                                                   | (Philips Achieva TX)                                                                                                                                                                                                                                                                                                                                                          |
| Native             | <ul style="list-style-type: none"> <li>• IR bSSFP</li> </ul>                                                                                                                                                                                                                                                                                                                 | <ul style="list-style-type: none"> <li>• IR spoiled GE</li> </ul>                                                                                                                                                                                                                                                                                                             |
| MOLLI              | <ul style="list-style-type: none"> <li>• SENSE factor 2</li> </ul>                                                                                                                                                                                                                                                                                                           | <ul style="list-style-type: none"> <li>• SENSE factor 2</li> </ul>                                                                                                                                                                                                                                                                                                            |
| T1-Map<br>(3 of 5) | <ul style="list-style-type: none"> <li>• 5s(3s)3s scheme</li> <li>• Typical TE/TR = 1.1/2.2 ms</li> <li>• Flip angle = 35°</li> <li>• Typical BW = 1100 Hz/pix</li> <li>• Typical in-plane resolution = 2.0 mm acq/1.1 mm recon</li> <li>• First TI after inversion from shortest possible value (typically 140 ms) to 350 ms</li> <li>• Slice thickness = 10 mm.</li> </ul> | <ul style="list-style-type: none"> <li>• 3(3)3(3)5 scheme</li> <li>• Typical TE/TR = 1.1/2.7 ms</li> <li>• Flip angle = 35°</li> <li>• Typical BW = 1100 Hz/pix</li> <li>• Typical in-plane resolution = 1.7 mm acq/1.1 mm recon</li> <li>• First TI after inversion from shortest possible value (typically 150 ms) to 350 ms</li> <li>• Slice thickness = 10 mm.</li> </ul> |

Garg et al. Extra-cellular expansion in the normal, non-infarcted myocardium is associated with worsening of regional myocardial function after acute myocardial infarction

| MRI        | 1.5 Tesla                                                  | 3 Tesla                                                       |
|------------|------------------------------------------------------------|---------------------------------------------------------------|
| Systems    | (Philips Ingenia Omega HP)                                 | (Philips Achieva TX)                                          |
| T2         | • SPIR TSE                                                 | • SPIR TSE                                                    |
| Weighted   | • SENSE factor 1.8                                         | • SENSE factor 2                                              |
| (full LV   | • TE/TR = 75/2000 ms                                       | • TE/TR = 90/1875 ms                                          |
| stack –    | • Flip angle = 90°                                         | • Flip angle = 90°                                            |
| contiguous | • Typical Bw = 500 Hz/pix                                  | • Typical BW = 400 Hz/pix                                     |
| slices)    | • Typical in-plane resolution<br>= 1.4 mm acq/0.8 mm recon | • Typical in-plane resolution<br>= 1.7 mm acq/1.4 mm<br>recon |
|            | • Slice thickness = 8 mm                                   | • Slice thickness = 10 mm                                     |

Garg et al. Extra-cellular expansion in the normal, non-infarcted myocardium is associated with worsening of regional myocardial function after acute myocardial infarction

| MRI             | 1.5 Tesla                                                                                                                                                                                                                                                                                                                                        | 3 Tesla                                                                                                                                                                                                                                                                                                                                           |
|-----------------|--------------------------------------------------------------------------------------------------------------------------------------------------------------------------------------------------------------------------------------------------------------------------------------------------------------------------------------------------|---------------------------------------------------------------------------------------------------------------------------------------------------------------------------------------------------------------------------------------------------------------------------------------------------------------------------------------------------|
| Systems         | (Philips Ingenia Omega HP)                                                                                                                                                                                                                                                                                                                       | (Philips Achieva TX)                                                                                                                                                                                                                                                                                                                              |
| EGE<br>(3 of 5) | <ul style="list-style-type: none"> <li>• IR spoiled GE</li> <li>• SENSE factor 1.7</li> <li>• Typical TE/TR = 2.8/5.7 ms</li> <li>• Flip angle = 25°</li> <li>• Typical BW = 300 Hz/pix</li> <li>• Typical in-plane resolution = 1.5 mm acq/0.8 mm recon</li> <li>• Look-Locker scout determined TI</li> <li>• Slice thickness = 8 mm</li> </ul> | <ul style="list-style-type: none"> <li>• IR spoiled GE</li> <li>• SENSE factor 1.5</li> <li>• Typical TE/TR = 2.0/3.8 ms</li> <li>• Flip angle = 25°</li> <li>• Typical BW = 700 Hz/pix</li> <li>• Typical in-plane resolution = 1.5 mm acq/0.7 mm recon</li> <li>• Look-Locker scout determined TI</li> <li>• Slice thickness = 10 mm</li> </ul> |

Garg et al. Extra-cellular expansion in the normal, non-infarcted myocardium is associated with worsening of regional myocardial function after acute myocardial infarction

| MRI        | 1.5 Tesla                       | 3 Tesla                       |
|------------|---------------------------------|-------------------------------|
| Systems    | (Philips Ingenia Omega HP)      | (Philips Achieva TX)          |
| LGE        | • PSIR spoiled GE               | • IR spoiled GE               |
| (full LV   | • SENSE factor 1.7              | • SENSE factor 1.5            |
| stack –    | • Typical TE/TR = 3.0/6.1 ms    | • Typical TE/TR = 2.0/3.7     |
| contiguous | • Flip angle = 25°              | ms                            |
| slices)    | • Typical BW = 250 Hz/pix       | • Flip angle = 25°            |
|            | • Typical in-plane resolution = | • Typical BW = 800 Hz/pix     |
|            | 1.6 mm acq/0.8 mm recon         | • Typical in-plane resolution |
|            | • Look-Locker scout determined  | =                             |
|            | TI                              | 1.6 mm acq/0.7 mm recon       |
|            | • Slice thickness = 10 mm       | • Look-Locker scout           |
|            |                                 | determined TI                 |
|            |                                 | • Slice thickness = 10 mm     |

Garg et al. Extra-cellular expansion in the normal, non-infarcted myocardium is associated with worsening of regional myocardial function after acute myocardial infarction

| MRI                | 1.5 Tesla                                                                                                                                                                                                                                                                                                                                         | 3 Tesla                                                                                                                                                                                                                                                                                                                                           |
|--------------------|---------------------------------------------------------------------------------------------------------------------------------------------------------------------------------------------------------------------------------------------------------------------------------------------------------------------------------------------------|---------------------------------------------------------------------------------------------------------------------------------------------------------------------------------------------------------------------------------------------------------------------------------------------------------------------------------------------------|
| Systems            | (Philips Ingenia Omega HP)                                                                                                                                                                                                                                                                                                                        | (Philips Achieva TX)                                                                                                                                                                                                                                                                                                                              |
| Post-              | • IR bSSFP                                                                                                                                                                                                                                                                                                                                        | • IR spoiled GE                                                                                                                                                                                                                                                                                                                                   |
| Contrast           | • SENSE factor 2                                                                                                                                                                                                                                                                                                                                  | • SENSE factor 2                                                                                                                                                                                                                                                                                                                                  |
| MOLLI              | • <b>4s(1s)3s(1s)2s scheme</b>                                                                                                                                                                                                                                                                                                                    | • <b>3(3)3(3)5 scheme</b>                                                                                                                                                                                                                                                                                                                         |
| T1-Map<br>(3 of 5) | <ul style="list-style-type: none"> <li>• Typical TE/TR = 1.1/2.2 ms</li> <li>• Flip angle = 35°</li> <li>• Typical BW = 1100 Hz/pix</li> <li>• Typical in-plane resolution = 2.0 mm acq/1.1 mm recon</li> <li>• First TI after inversion from shortest possible value (typically 140 ms) to 350 ms</li> <li>• Slice thickness = 10 mm.</li> </ul> | <ul style="list-style-type: none"> <li>• Typical TE/TR = 1.1/2.7 ms</li> <li>• Flip angle = 35°</li> <li>• Typical BW = 1100 Hz/pix</li> <li>• Typical in-plane resolution = 1.7 mm acq/1.1 mm recon</li> <li>• First TI after inversion from shortest possible value (typically 150 ms) to 350 ms</li> <li>• Slice thickness = 10 mm.</li> </ul> |

Abbreviations: bSSFP, MOLLI, MRI, HLA, VLA, LV, SPIR, SENSE, PSIR, BW, LGE, EGE, GE, IR

Garg et al. Extra-cellular expansion in the normal, non-infarcted myocardium is associated with worsening of regional myocardial function after acute myocardial infarction

**Table 2.** Segmental radial strain at acute CMR and follow-study in the three categories of myocardial segments.

| Type of segments | Radial Strain (%) |         |              |         |         |
|------------------|-------------------|---------|--------------|---------|---------|
|                  | Acute             |         | At follow-up |         | P-Value |
|                  | Median            | 25%-75% | Median       | 25%-75% |         |
| Normal (n=325)   | 8.1               | 6-10.5  | 8.2          | 1-4.8   | 0.04    |
| Oedema (n=246)   | 5.9               | 3.6-8   | 6.78         | 4.5-9.5 | <0.0001 |
| Infarct (n=229)  | 2.7               | 1.1-4.8 | 4.2          | 2.3-6.9 | <0.0001 |



Garg et al. Extra-cellular expansion in the normal, non-infarcted myocardium is associated with worsening of regional myocardial function after acute myocardial infarction

**Reference:**

1. Schulz-Menger J, Bluemke DA, Bremerich J, Flamm SDS, Fogel MA, Friedrich MGM, et al. Standardized image interpretation and post processing in cardiovascular magnetic resonance: Society for Cardiovascular Magnetic Resonance (SCMR) board of trustees task force on standardized post processing. *J. Cardiovasc. Magn. Reson. BioMed Central*; 2013;15:35.
2. Flett AS, Hasleton J, Cook C, Hausenloy D, Quarta G, Ariti C, et al. Evaluation of techniques for the quantification of myocardial scar of differing etiology using cardiac magnetic resonance. *JACC. Cardiovasc. Imaging*. 2011;4:150–6.
3. Amado LC, Gerber BL, Gupta SN, Rettmann DW, Szarf G, Schock R, et al. Accurate and objective infarct sizing by contrast-enhanced magnetic resonance imaging in a canine myocardial infarction model. *J. Am. Coll. Cardiol*. 2004;44:2383–9.
4. Aletras AH, Tilak GS, Natanzon A, Hsu L-Y, Gonzalez FM, Hoyt RF, et al. Retrospective determination of the area at risk for reperfused acute myocardial infarction with T2-weighted cardiac magnetic resonance imaging: histopathological and displacement encoding with stimulated echoes (DENSE) functional validations. *Circulation*. 2006;113:1865–70.
5. Russo C, Jin Z, Homma S, Rundek T, Elkind MS V, Sacco RL, et al. Relationship of multidirectional myocardial strain with radial thickening and ejection fraction and impact of left ventricular hypertrophy: a study in a community-based cohort. *Echocardiography. NIH Public Access*; 2013;30:794–802.
